# Supplementary material
Source: PubMed Central journal article supplement (PMC1166586)

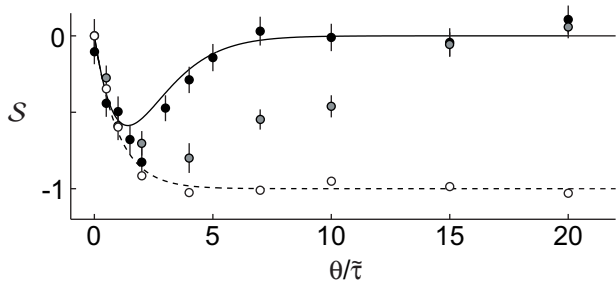

Supplement: pnas_0407659102_1.pdf [file pnas_0407659102_1.pdf]
